## Hydrogen sulfide mediates hypoxia-induced relaxation of trout urinary bladder smooth muscle

Ryan A. Dombkowski<sup>1,2</sup>, Meredith M. Doellman<sup>2</sup>, Sally K. Head<sup>2</sup> and Kenneth R. Olson<sup>1,2,\*</sup>

<sup>1</sup>South Bend Center for Medical Education, Indiana University School of Medicine, University of Notre Dame, Notre Dame, IN 46556, USA and <sup>2</sup>Department of Biological Sciences, University of Notre Dame, Notre Dame, IN 46556, USA

\*Author for correspondence (e-mail: kolson@nd.edu)

Accepted 8 June 2006

### Summary

Hydrogen sulfide (H<sub>2</sub>S) is a recently identified gasotransmitter that may mediate hypoxic responses in vascular smooth muscle. H<sub>2</sub>S also appears to be a signaling molecule in mammalian non-vascular smooth muscle, but its existence and function in non-mammalian non-vascular smooth muscle have not been examined. In the present study we examined H<sub>2</sub>S production and its physiological effects in urinary bladder from steelhead and rainbow trout (*Oncorhynchus mykiss*) and evaluated the relationship between H<sub>2</sub>S and hypoxia. H<sub>2</sub>S was produced by trout bladders, and its production was sensitive to inhibitors of cystathionine β-synthase and cystathionine γ-lyase. H<sub>2</sub>S produced a dose-dependent relaxation in unstimulated and carbachol pre-contracted bladders and inhibited spontaneous contractions. Bladders pre-contracted with 80 mmol l<sup>-1</sup> KCl were less sensitive to H<sub>2</sub>S than bladders contracted with either 80 mmol l<sup>-1</sup> KC<sub>2</sub>H<sub>3</sub>O<sub>2</sub> (KAc) or carbachol, suggesting that some of the H<sub>2</sub>S effects are mediated through an ion channel. However, H<sub>2</sub>S relaxation of bladders was not affected by the

potassium channel inhibitors, apamin, charybdotoxin, 4-aminopyridine, and glybenclamide, or by chloride channel/exchange inhibitors 4,4'-Diisothiocyanatostilbene-2,2'-disulfonic acid disodium salt, tamoxifen and glybenclamide, or by the presence or absence of extracellular HCO<sub>3</sub><sup>-</sup>. Inhibitors of neuronal mechanisms, tetrodotoxin, strychnine and *N*-vanillylnonanamide were likewise ineffective. Hypoxia (aeration with N<sub>2</sub>) also relaxed bladders, was competitive with H<sub>2</sub>S for relaxation, and it was equally sensitive to KCl, and unaffected by neuronal blockade or the presence of extracellular HCO<sub>3</sub><sup>-</sup>. Inhibitors of H<sub>2</sub>S synthesis also inhibited hypoxic relaxation. These experiments suggest that H<sub>2</sub>S is a phylogenetically ancient gasotransmitter in non-mammalian non-vascular smooth muscle and that it serves as an oxygen sensor/transducer, mediating the effects of hypoxia.

Key words: H<sub>2</sub>S, hypoxia, smooth muscle, urinary bladder, trout.

### Introduction

Hydrogen sulfide (H<sub>2</sub>S) is a recently described endogenous gasotransmitter with considerable regulatory activity. H<sub>2</sub>S is synthesized by, and has physiological actions in, a variety of mammalian tissues including brain (Abe and Kimura, 1996; Kimura, 2000; Kimura, 2002), vascular (Hosoki et al., 1997; Zhao et al., 2001; Zhao and Wang, 2002; Cheng et al., 2004), gastrointestinal (Hosoki et al., 1997; Teague et al., 2002), genitourinary (Patacchini et al., 2004; Patacchini et al., 2005) and reproductive (Hayden et al., 1989; Sidhu et al., 2001; Teague et al., 2002) tracts, pulmonary system (Shi et al., 2003; Zhang et al., 2003; Cheng et al., 2004), and heart (Zhang et al., 2003; Geng et al., 2004). H<sub>2</sub>S relaxes most mammalian smooth muscles including systemic vessels (Hosoki et al., 1997; Zhao et al., 2001; Zhao and Wang, 2002; Cheng et al., 2004), intestine (Hosoki et al., 1997; Teague et al., 2002),

uterus (Sidhu et al., 2001) and vas deferens (Teague et al., 2002). Rat urinary bladder detrusor muscle is the only tissue reported to date where H<sub>2</sub>S produces a contraction (Patacchini et al., 2004; Patacchini et al., 2005). ATP-sensitive K<sup>+</sup> channels (K<sub>ATP</sub>) have been proposed to mediate H<sub>2</sub>S-mediated relaxation of vascular smooth muscle (Zhao et al., 2001; Zhao and Wang, 2002), but they do not appear to be involved in either gastrointestinal or reproductive smooth muscle relaxation (Teague et al., 2002). Contraction of the rat urinary bladder appears to be indirect *via* stimulation of capsaicin-sensitive afferent neurons (Patacchini et al., 2004; Patacchini et al., 2005).

We have shown that H<sub>2</sub>S may relax or contract vascular smooth muscle in non-mammalian vertebrates and many vessels relax at lower H<sub>2</sub>S concentrations ([H<sub>2</sub>S]) and then contract at higher [H<sub>2</sub>S] (Dombkowski et al., 2004;

Dombkowski et al., 2005; Olson, 2005). We (Olson et al., 2006) recently observed that H<sub>2</sub>S also constricts, or has multi-phasic dilation/constriction effects on some mammalian vessels such as bovine and rat pulmonary arteries. To our knowledge, there is no evidence for a direct H<sub>2</sub>S-mediated contraction of non-vascular smooth muscle, nor is there any information on the effects of H<sub>2</sub>S on non-mammalian, non-vascular smooth muscle.

Recently, we (Olson et al., 2006) proposed that H<sub>2</sub>S serves as a vascular oxygen sensor and that it plays an integral role in both hypoxic vasoconstriction of pulmonary vessels and cyclostome aortas and it is also involved in hypoxic dilation of mammalian systemic vessels. This model is based on continual oxidative inactivation of constitutively generated H<sub>2</sub>S during normoxia and the development of vasoactive levels of H<sub>2</sub>S when available oxygen falls. It is not known if this model is only applicable to vascular smooth muscle or if it is a feature of smooth muscle in general.

Spontaneous and agonist-induced contraction of rat urinary bladder, like that of systemic vessels, decreases when exposed to hypoxia (Leven et al., 1999; Whitbeck et al., 1999; Waring and Wendt, 2000), which is opposite to the contractile effect of H<sub>2</sub>S, albeit indirect, in this same tissue (Patacchini et al., 2004; Patacchini et al., 2005). To our knowledge, the effects of hypoxia on non-mammalian non-vascular smooth muscle are not known.

The purpose of the experiments reported here were threefold: (1) to determine if H<sub>2</sub>S affects contractile properties of non-mammalian, non-vascular smooth muscle and examine the mechanism(s) involved, (2) to evaluate the effects of hypoxia on the same tissue, and (3) to determine if H<sub>2</sub>S mediates the hypoxic response. To this end we used urinary bladders from steelhead and rainbow trout and measured H<sub>2</sub>S production, H<sub>2</sub>S effects on spontaneous and agonist-induced contractions and possible mechanisms of action, effects of hypoxia on bladder contractions, and the effects of inhibiting H<sub>2</sub>S synthesis on the hypoxic responses.

## Materials and methods

### Animals

Steelhead trout (*Oncorhynchus mykiss* Walbaum, skamania strain, 3–7 kg) of either sex were used for tissue production and most myography studies as the urinary bladders are large. Fish were captured by the Indiana Department of Natural Resources (DNR) during the fall migration of 2003 and 2004 and kept at the Richard Clay Bodine State Fish Hatchery until the spawning season (January–March). The fish were anesthetized in ethyl m-aminobenzoate methanesulfonate (MS-222), and after the spawn was collected by the DNR, urinary bladders were removed, placed in 4°C Hepes-buffered saline with glucose, and transported back to the laboratory where they were thoroughly cleaned of loose connective tissue and blood.

Because the steelhead trout were no longer available after March, we used urinary bladders from rainbow trout (*O. mykiss*, Walbaum, kamloops strain, 0.3–0.8 kg) for several

experiments. Rainbow trout of either sex were purchased from a local hatchery (Homestead Trout Farm, Harrietta, MI, USA), and maintained throughout the year in 2000 liter tanks containing circulating well-water at 12–15°C, aerated with filtered room air, with a 12 h:12 h light:dark cycle. The fish were fed a maintenance diet of commercial trout pellets (Purina, St Louis, MO, USA). The rainbow trout were stunned by a blow to the head and the bladders prepared for myography, as described above. Although the bladders from the rainbow trout were considerably smaller than those from the steelhead trout, their sensitivity to NaHS, Na<sub>2</sub>S, and N<sub>2</sub> was identical to steelhead bladders, therefore, ‘trout’ is used hereafter to refer to experiments on either strain. All procedures followed NIH guidelines and were approved by the local IACUC Committee.

### Myography

Circular smooth muscle rings, approximately one-half centimeter long, and immediately distal to the trigone were mounted on 280 µm-diameter stainless steel wire hooks and suspended in 5 ml water-jacketed smooth muscle baths filled with 14°C Hepes buffer and aerated with room air. The bottom hooks were stationary; the upper ones were connected to Grass model FT03C force-displacement transducers (Grass Instruments, West Warwick, RI, USA). Tension was measured on a Grass Model 7E or 7F polygraph (Grass Instruments, West Warwick, RI, USA). Polygraph sensitivity was set to detect changes as small as 5 mg. Data was archived on a PC computer at 1 Hz using SoftWire (Measurement Computing, Middleboro, MA, USA). The chart recorders and software were calibrated prior to each experiment.

Baseline (resting) tension of approximately 200 mg was applied and continuously adjusted for at least 1 h prior to experimentation as the bladders exhibited substantial stress relaxation. The bladders were then contracted with 80 mmol l<sup>-1</sup> KCl, washed twice, and resting tension re-established for a minimum for 30 min before further experimentation. A second KCl contraction was given in initial studies, but as this contraction was not different from the first it was omitted in later experiments.

### H<sub>2</sub>S responses

The cumulative dose–response characteristics of NaHS, which forms HS- and H<sub>2</sub>S in solution similar to that produced by gassing with H<sub>2</sub>S gas (Zhao et al., 2001), were examined in otherwise unstimulated bladders. Because H<sub>2</sub>S inhibited spontaneous contractions and relaxed unstimulated bladders, the cumulative dose–response characteristics of NaHS were also examined in 10 µmol l<sup>-1</sup> carbamylcholine chloride (carbachol, CARB)-prestimulated bladders. In later experiments, Na<sub>2</sub>S, which also forms HS- and H<sub>2</sub>S in solution, was used, because of its availability with a reduced amount of elemental sulfur impurities (Doeller et al., 2005). As the effects of Na<sub>2</sub>S and NaHS were similar, H<sub>2</sub>S is used in the context of either NaHS or Na<sub>2</sub>S unless otherwise specified.

Potential mechanisms of H<sub>2</sub>S-induced relaxation were evaluated in carbachol pre-stimulated bladders. The rings were

treated with the inhibitor, followed 15 min later by pre-stimulation with carbachol ( $10 \mu\text{mol l}^{-1}$ ), and at the plateau contraction they were exposed to  $1 \text{ mmol l}^{-1} \text{ H}_2\text{S}$ . Control rings were treated similarly omitting the inhibitor, and only one experiment was performed per ring. Potassium channels were inhibited with apamin (APA,  $100 \text{ nmol l}^{-1}$ ), a small conductance  $\text{K}_{\text{Ca}}$  channel ( $\text{SK}_{\text{Ca}}$ ) inhibitor, charybdotoxin (CTX,  $50 \text{ nmol l}^{-1}$ ), a large conductance  $\text{K}_{\text{Ca}}$  channel ( $\text{BK}_{\text{Ca}}$ ) inhibitor, 4-aminopyridine (4-AP,  $100 \mu\text{mol l}^{-1}$ ), a voltage sensitive  $\text{K}^+$  channel inhibitor, and by using APA and CTX in combination. Chloride channel/exchangers were inhibited with glibenclamide (GLY,  $10 \mu\text{mol l}^{-1}$ ), a cystic fibrosis transmembrane conductance regulator (CFTR) and  $\text{K}_{\text{ATP}}$  channel inhibitor, 4,4'-diisothiocyanatostilbene-2,2'-disulfonic acid disodium salt hydrate (DIDS,  $400 \mu\text{mol l}^{-1}$ ), an inhibitor of  $\text{Cl}^-/\text{HCO}_3^-$  exchange, and tamoxifen (TAM,  $100 \mu\text{mol l}^{-1}$ ), a volume-sensitive  $\text{Cl}^-$  channel inhibitor. The effects of the primary afferent nerve irritant *N*-vanillylnonanamide ( $10 \mu\text{mol l}^{-1}$ ; a synthetic capsaicin with similar biological activity) were also examined.

In order to determine if the  $\text{H}_2\text{S}$  relaxation was affected by the type of pre-contraction stimulus, the effects of  $1 \text{ mmol l}^{-1} \text{ H}_2\text{S}$  were also examined on bladders contracted with  $80 \text{ mmol l}^{-1} \text{ KCl}$  or  $80 \text{ mmol l}^{-1} \text{ KC}_2\text{H}_3\text{O}_2$  (KAc). The effects of strychnine ( $10 \mu\text{mol l}^{-1}$ ), a glycine/NMDA receptor antagonist, tetrodotoxin (TTX,  $10 \mu\text{mol l}^{-1}$ ), a fast  $\text{Na}^+$  channel inhibitor, and a bicarbonate-based buffer (Cortland) on  $\text{H}_2\text{S}$ -induced relaxation were also examined in the KCl and KAc prestimulated bladders.

#### *H<sub>2</sub>S production*

Pieces from ten different bladders were pooled for each experiment, blotted dry, weighed, and homogenized on ice in  $100 \text{ mmol l}^{-1}$  potassium phosphate buffer (pH 7.4).  $\text{H}_2\text{S}$  production was measured as described previously (Zhao et al., 2003), with minor modifications. Briefly, the homogenates were brought to a final volume of 1:10 tissue mass:nutrient buffer volume. Nutrient phosphate buffer contained  $10 \text{ mmol l}^{-1}$  cysteine and  $2 \text{ mmol l}^{-1}$  pyridoxal-5'-phosphate. In other experiments, the nutrient buffer also contained the cystathionine  $\gamma$ -lyase (CSE) inhibitor, D,L-propargylglycine (PPG;  $20 \text{ mmol l}^{-1}$ ) or the cystathionine  $\beta$ -synthase (CBS) inhibitor, amino-oxyacetic acid (AOA;  $1 \text{ mmol l}^{-1}$ ). The final mixture was then drawn into 10 ml polyethylene syringes, air bubbles were expelled, and the syringes sealed with three-way stopcocks and gently rotated for 24 h at room temperature. A glass bead in the syringe assisted mixing. At the end of the incubation, 1 ml samples of the homogenate solution were placed in 1.5 ml centrifuge tubes and immediately centrifuged. The supernatant was removed and mixed 1:1 with an antioxidant buffer made according to the manufacturer's specifications. This buffer converted all  $\text{H}_2\text{S}$  and  $\text{HS}^-$  to  $\text{S}^{2-}$ , which was then measured with a sulfide electrode (Lazar Research Laboratories, Los Angeles, CA, USA) on a Fisher Accumet AR50 pH meter (Fisher Scientific, Pittsburgh, PA, USA) following the manufacturer's

directions. Standards were prepared from  $\text{Na}_2\text{S}$ , all measurements were done in triplicate.

#### *Hypoxic responses*

The effects of hypoxia, produced by gassing with  $\text{N}_2$  rather than air, were examined in otherwise un-stimulated and  $10 \mu\text{mol l}^{-1}$  carbachol,  $80 \text{ mmol l}^{-1} \text{ KCl}$ , or  $80 \text{ mmol l}^{-1} \text{ KAc}$  pre-contracted bladders. Similar to the mechanistic examination of  $\text{H}_2\text{S}$ ,  $\text{N}_2$  was also tested on prestimulated bladders. The effects of strychnine, tetrodotoxin and Cortland saline on the hypoxic response were also examined in KCl and KAc pre-contracted bladders.

#### *Relationship between H<sub>2</sub>S and hypoxia*

Two experiments were employed to examine the relationship between  $\text{H}_2\text{S}$  and hypoxic relaxation. The first experiments were designed to determine if the relaxation produced by  $\text{H}_2\text{S}$  and hypoxia was additive or competitive. Bladders were pre-contracted with carbachol, KCl or KAc and then exposed to either  $1 \text{ mmol l}^{-1} \text{ H}_2\text{S}$  or hypoxia. When tension stabilized, the other stimulus (hypoxia or  $\text{H}_2\text{S}$ , respectively) was applied. In the second experiments, the effects of inhibiting  $\text{H}_2\text{S}$  synthesis on hypoxic relaxation of un-stimulated and carbachol, KCl, or KAc pre-contracted bladders was examined. The CSE and CBS inhibitors (PPG,  $10 \text{ mmol l}^{-1}$ , and AOA,  $1 \text{ mmol l}^{-1}$ , respectively) were added at least 15 min prior to hypoxia.

#### *Data analysis*

Dose-response curves were fit for each vessel using Table Curve<sup>®</sup> (Jandel Corp., Chicago, IL, USA). Student's *t*-tests were used for comparisons between groups with SigmaStat<sup>®</sup> (Jandel Corp.). Results are provided as mean  $\pm$  s.e.m. Significance was assumed at  $P \leq 0.05$ .

#### *Chemicals*

Unless otherwise stated all chemicals were purchased from Sigma-Aldrich Co. (St Louis, MO, USA).  $\text{Na}_2\text{S}$  and NaHS were purchased from Fisher Scientific (Pittsburgh, PA, USA). Concentrations for the Hepes-buffered trout saline (pH 7.8) were as follows (in  $\text{mmol l}^{-1}$ ): 145 NaCl, 3 KCl, 0.57  $\text{MgSO}_4$ , 2  $\text{CaCl}_2$ , 5 glucose, 3 Hepes acid, and 7 Hepes  $\text{Na}^+$  salt. Concentrations of the Cortland-buffered trout saline (pH 7.8) were as follows (in  $\text{mmol l}^{-1}$ ): 124 NaCl, 3 KCl, 1.1  $\text{MgSO}_4$ , 2  $\text{CaCl}_2$ , 5.55 glucose, 12  $\text{NaHCO}_3$ , 0.09  $\text{NaH}_2\text{PO}_4$ , and 1.8  $\text{Na}_2\text{HPO}_4$ . Hepes and Cortland buffers were used within 72 h of preparation. NaHS and  $\text{Na}_2\text{S}$  stock solutions for electrode calibration and bath application were used within 8 h of preparation.

## **Results**

#### *Effects of H<sub>2</sub>S*

$\text{H}_2\text{S}$  concentrations at or above  $100 \mu\text{mol l}^{-1}$  relaxed otherwise un-stimulated bladders and partially inhibited spontaneous contractions. Spontaneous contractions were completely inhibited when  $\text{H}_2\text{S}$  concentration reached

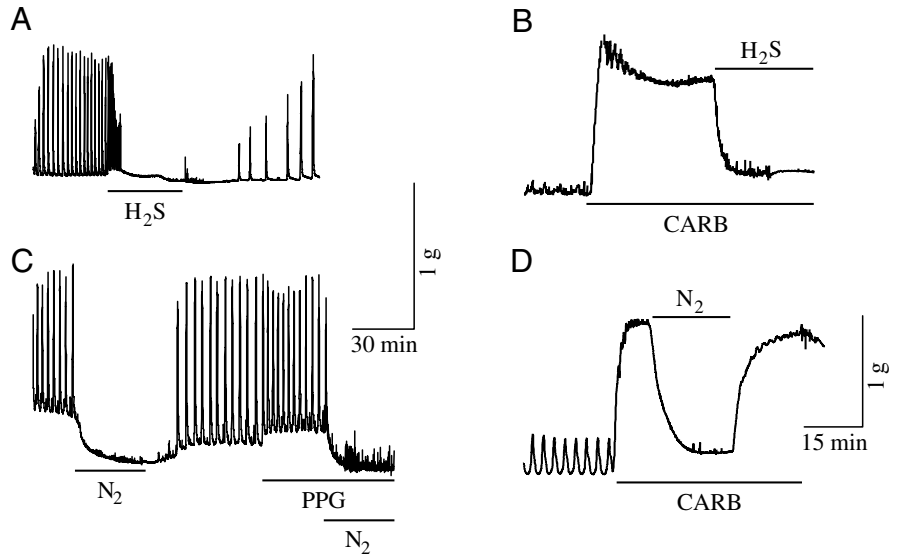

Fig. 1. Typical tracings of the effects of 1 mmol l<sup>-1</sup> H<sub>2</sub>S (as NaHS) on un-stimulated (A) and 10 μmol l<sup>-1</sup> carbachol (CARB)-pre-contracted (B) trout bladders and the effects of hypoxia (N<sub>2</sub>) on un-stimulated (C) and CARB-pre-contracted (D) bladders. C also shows the effect of 10 mmol l<sup>-1</sup> of cystathionine γ-lyase inhibitor, D,L-propargylglycine (PPG; N=4) on un-stimulated bladders before and after exposure to N<sub>2</sub>. Scale bars, force–time scale for A and C (left), B and D (right).

1 mmol l<sup>-1</sup> (Fig. 1A). H<sub>2</sub>S relaxed 10 μmol l<sup>-1</sup> carbachol-pre-contracted bladders in a dose-dependent manner with an EC<sub>50</sub> (concentration producing half-maximal response) of 129±50 μmol l<sup>-1</sup> H<sub>2</sub>S (N=8). At 1 mmol l<sup>-1</sup> H<sub>2</sub>S, 10 μmol l<sup>-1</sup> carbachol-contracted bladders were nearly completely relaxed (Fig. 1B). As the efficacy of 1 mmol l<sup>-1</sup> Na<sub>2</sub>S was not significantly greater than that of 1 mmol l<sup>-1</sup> NaHS in relaxing a carbachol contraction (98.8±7.4%; N=8 versus 82.2±6.7%;

N=8, respectively; Fig. 2), ‘H<sub>2</sub>S’ is used to denote either NaHS or Na<sub>2</sub>S treatment. H<sub>2</sub>S was significantly less efficacious in relaxing KCl-contracted bladders (27.1±6.2% relaxation) than it was in bladders contracted with either carbachol or KAc (52.6±14.8% relaxation; Fig. 2). There was no significant difference in the force of bladder contraction produced by carbachol (1.83±0.26 g; N=28), KCl (1.68±0.33 g; N=16), or KAc (1.66±0.24 g; N=16).

Potassium channel inhibitors: apamin (APA, 100 nmol l<sup>-1</sup>; N=4), charybdotoxin (CTX, 50 nmol l<sup>-1</sup>; N=4), 4-aminopyridine (4-AP, 100 μmol l<sup>-1</sup>; N=4), and APA and CTX in combination (N=4) did not significantly affect on the magnitude of either a carbachol contraction or the ability of H<sub>2</sub>S to relax the carbachol contraction (Fig. 3). Antagonists of chloride channels and/or exchangers, glibenclamide (GLY, 10 μmol l<sup>-1</sup>; N=4) and tamoxifen (TAM, 100 μmol l<sup>-1</sup>; N=4)

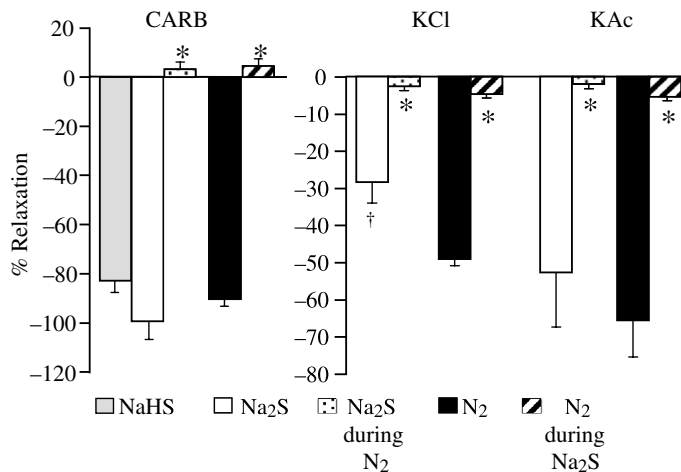

Fig. 2. Comparison of the relaxation efficacy of 1 mmol l<sup>-1</sup> H<sub>2</sub>S (as Na<sub>2</sub>S) and hypoxia (N<sub>2</sub>) on 10 μmol l<sup>-1</sup> carbachol (CARB)-, 80 mmol l<sup>-1</sup> KCl- and 80 mmol l<sup>-1</sup> potassium acetate (KAc)-contracted trout urinary bladders (all N=8) and the effects of H<sub>2</sub>S application on a pre-existing N<sub>2</sub> exposure and of N<sub>2</sub> application on a pre-existing H<sub>2</sub>S exposure in pre-contracted bladders (all N=4). H<sub>2</sub>S (as NaHS) relaxation of CARB-contracted vessels is also shown. Values are means ± s.e.m. H<sub>2</sub>S was significantly less efficacious on KCl-contracted bladders than bladders pre-contracted with either CARB or KAc (†). Bladders relaxed with either H<sub>2</sub>S or N<sub>2</sub> did not respond to the other (N<sub>2</sub> or H<sub>2</sub>S, respectively), irrespective of the pre-contractile agonist (\*). There was no difference in the relaxation produced by Na<sub>2</sub>S and NaHS.

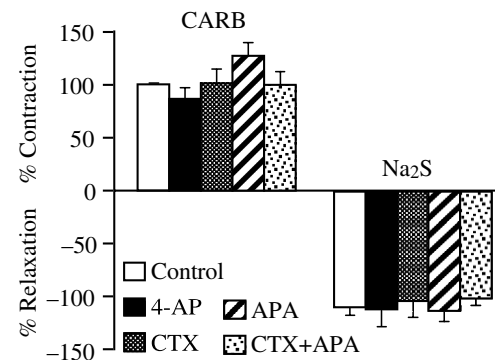

Fig. 3. Effects of K<sup>+</sup> channel inhibitors 4-aminopyridine (4-AP; 100 μmol l<sup>-1</sup>; N=4), apamin (APA, 100 nmol l<sup>-1</sup>; N=4), charybdotoxin (CTX; 50 nmol l<sup>-1</sup>; N=4) and APA and CTX in combination (N=4) on a 10 μmol l<sup>-1</sup> carbachol contraction (left) and on a 1 mmol l<sup>-1</sup> H<sub>2</sub>S (as Na<sub>2</sub>S)-induced relaxation of a 10 μmol l<sup>-1</sup> carbachol prestimulated bladder (right); all controls, N=8. Values are means ± s.e.m. The inhibitors had no significant effect on either the CARB contraction or the H<sub>2</sub>S relaxation.



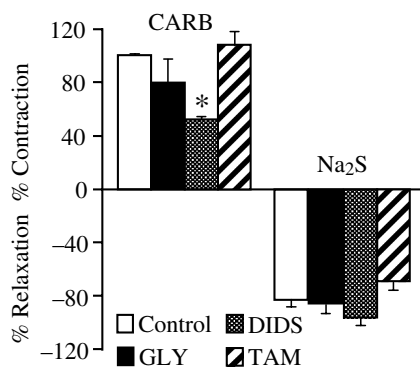

Fig. 4. Effects of  $\text{Cl}^-$  channel/exchange antagonists, glibenclamide (GLY;  $10 \mu\text{mol l}^{-1}$ ;  $N=4$ ), 4,4'-diisothiocyanatostilbene-2,2'-disulfonic acid disodium salt hydrate (DIDS;  $400 \mu\text{mol l}^{-1}$ ;  $N=4$ ), and tamoxifen (TAM;  $100 \mu\text{mol l}^{-1}$ ;  $N=4$ ) on a  $10 \mu\text{mol l}^{-1}$  carbachol contraction (left) or a  $1 \text{mmol l}^{-1}$   $\text{H}_2\text{S}$  (as  $\text{Na}_2\text{S}$ )-induced relaxation of a  $10 \mu\text{mol l}^{-1}$  carbachol-prestimulated bladder (right); all controls,  $N=8$ . Values are means  $\pm$  s.e.m. DIDS significantly (\*) reduced the CARB contraction; there were no other significant differences.

did not affect a  $10 \mu\text{mol l}^{-1}$  carbachol contraction, whereas DIDS ( $400 \mu\text{mol l}^{-1}$ ;  $N=4$ ) halved ( $P \leq 0.05$ ) the force developed (Fig. 4). The ability of  $\text{H}_2\text{S}$  to relax carbachol-contracted bladders was unaffected by GLY, TAM or DIDS (Fig. 4). Incubation with *N*-vanillylnonanamide ( $10 \mu\text{mol l}^{-1}$ ;  $N=4$ ) did not affect either the magnitude of a carbachol contraction or the ability of  $\text{H}_2\text{S}$  to relax the carbachol contraction (data not shown). Strychnine ( $10 \mu\text{mol l}^{-1}$ ;  $N=4$ ), tetrodotoxin (TTX,  $10 \mu\text{mol l}^{-1}$ ;  $N=4$ ) or substituting Cortland buffer for Hepes buffer ( $N=4$ ) did not affect either KCl or KAc contractions or the ability of  $\text{H}_2\text{S}$  to relax them (not shown).

#### Effects of hypoxia

Hypoxia ( $\text{N}_2$ ) reduced baseline tone and inhibited spontaneous contractions in otherwise un-stimulated bladders and in  $10 \mu\text{mol l}^{-1}$  carbachol-contracted bladders (Fig. 1C,D). As shown in Fig. 2, hypoxia was significantly less efficacious in relaxing KCl-contracted bladders ( $49.0 \pm 1.6\%$  relaxation) than it was in bladders contracted with carbachol ( $89.8 \pm 2.5\%$  relaxation). Hypoxic relaxation of KAc-contracted bladders ( $65.6 \pm 9.7\%$ ) was not significantly different from hypoxic relaxation of either carbachol- or KCl-contracted bladders (Fig. 2; all  $N=8$ ). Strychnine ( $10 \mu\text{mol l}^{-1}$ ;  $N=4$ ), tetrodotoxin (TTX,  $10 \mu\text{mol l}^{-1}$ ;  $N=4$ ) or substituting Cortland buffer for Hepes buffer ( $N=4$ ) did not affect the ability of  $\text{N}_2$  to relax contractions produced by either  $80 \text{mmol l}^{-1}$  KCl or  $80 \text{mmol l}^{-1}$  KAc (not shown; all  $N=4$ ).

#### $\text{H}_2\text{S}$ production

Homogenates of trout urinary bladders produced  $\text{H}_2\text{S}$  enzymatically (Fig. 5). The cystathionine  $\gamma$ -lyase inhibitor, D,L-propargylglycine ( $20 \text{mmol l}^{-1}$ ), reduced  $\text{H}_2\text{S}$  synthesis by over 80% and the cystathionine  $\beta$ -synthase inhibitor, amino-oxyacetic acid ( $1 \text{mmol l}^{-1}$ ), reduced  $\text{H}_2\text{S}$  synthesis by over 95% (Fig. 5).

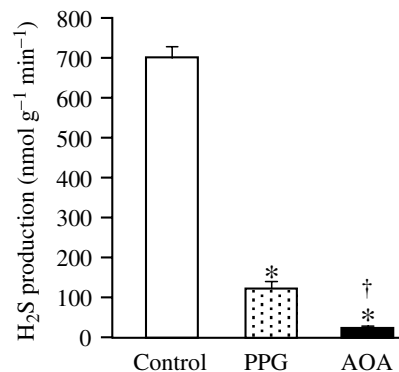

Fig. 5. Twenty-four hour production of  $\text{H}_2\text{S}$  by trout in the presence of no inhibitors (Control), the cystathionine  $\gamma$ -lyase inhibitor, D,L-propargylglycine (PPG;  $20 \text{mmol l}^{-1}$ ) or the cystathionine  $\beta$ -synthase inhibitor, amino-oxyacetic acid (AOA;  $1 \text{mmol l}^{-1}$ ). Values are means  $\pm$  s.e.m. \*Significantly different from control; †significantly different from control and PPG; all samples were from pooled bladders and analyzed in triplicate.

#### Relationship between $\text{H}_2\text{S}$ and hypoxia

Hypoxia applied after  $\text{H}_2\text{S}$  did not produce any additional relaxation in bladders pre-contracted with carbachol, KCl or KAc (Fig. 2). When  $\text{H}_2\text{S}$  was added after hypoxia in pre-contracted bladders it was similarly ineffective (Fig. 2).

The cystathionine  $\gamma$ -lyase inhibitor, D,L-propargylglycine, caused a slight increase in baseline tone and an increase in the frequency of spontaneous contractions but did not prevent the  $\text{N}_2$ -induced relaxation or inhibition of spontaneous contractions in un-stimulated bladders (Fig. 1C); this was consistent in bladders from four fish. The cystathionine  $\beta$ -synthase inhibitor, amino-oxyacetic acid ( $1 \text{mmol l}^{-1}$ ) did not appear to have any effect on resting tone, spontaneous contractions, or  $\text{N}_2$ -induced relaxation ( $N=4$ ; not shown). Hypoxic relaxation of carbachol-

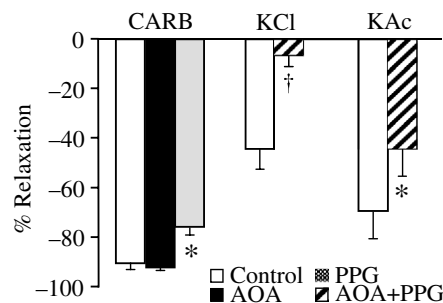

Fig. 6. Effects of inhibitors of  $\text{H}_2\text{S}$  synthesis on hypoxic ( $\text{N}_2$ ) relaxation of pre-contracted bladders. The cystathionine  $\gamma$ -lyase inhibitor, D,L-propargylglycine (PPG;  $20 \text{mmol l}^{-1}$ ) significantly decreased a  $\text{N}_2$  relaxation of  $10 \mu\text{mol l}^{-1}$  carbachol-pre-contracted bladders and a mixture of PPG and the cystathionine  $\beta$ -synthase inhibitor, amino-oxyacetic acid (AOA;  $1 \text{mmol l}^{-1}$ ) significantly inhibited  $\text{N}_2$  relaxation of both  $80 \text{mmol l}^{-1}$  KCl- and  $80 \text{mmol l}^{-1}$  KAc-pre-contracted bladders ( $N=4$  for all experimental groups;  $N=8$  for controls). Values are means  $\pm$  s.e.m. \*Significantly different from the respective control; †significantly different from all other conditions.

pre-contracted bladders was partially inhibited by amino-oxyacetic acid, and a mixture of D,L-propargylglycine and amino-oxyacetic acid inhibited hypoxic relaxation of both KCl- and KAc-contracted bladders (Fig. 6; *N*=8 for controls, *N*=4 for each treatment).

### Discussion

The present experiments show that trout bladders synthesize H<sub>2</sub>S and that H<sub>2</sub>S relaxes and decreases spontaneous contractions in bladders at concentrations slightly above those reported in rainbow trout plasma *in vivo* (Dombkowski et al., 2004). Our experiments also show that both the response of trout bladder to H<sub>2</sub>S and the potential mechanism of H<sub>2</sub>S action is unlike that observed in the rat. Whereas some of the differences between trout and rats may be due to the different derivation of the tissue, fish bladders are mesodermal and noncloacal in origin whereas tetrapod bladders are derivatives of the cloaca (Kardong, 2005), our results, nevertheless, suggest that H<sub>2</sub>S is an endogenous signaling molecule in non-mammalian non-vascular smooth muscle.

#### Mechanism of H<sub>2</sub>S action

H<sub>2</sub>S-induced relaxation of mammalian vascular smooth muscle appears to be partially mediated by the activation of ATP-sensitive potassium (K<sub>ATP</sub>) channels (Zhao et al., 2001; Zhao and Wang, 2002). However, these channels do not seem to contribute to H<sub>2</sub>S relaxation of mammalian non-vascular smooth muscle (Teague et al., 2002), nor do they appear to mediate responses in the trout urinary bladder because the sulfonylurea K<sub>ATP</sub> channel inhibitor, glibenclamide, which partially inhibits H<sub>2</sub>S relaxation of rat aortas (Zhao et al., 2001; Zhao and Wang, 2002) is ineffective in trout bladders (Fig. 4). In fact our findings failed to support the involvement of any type of potassium channel because none of a variety of classical potassium channel inhibitors affected the H<sub>2</sub>S response (Figs 3, 4), nor did elevation of extracellular [K<sup>+</sup>] to 80 mmol l<sup>-1</sup> with potassium acetate (KAc). The latter would be expected to substantially reduce transmembrane K<sup>+</sup> gradients and obviate K<sup>+</sup> channels.

The reduced H<sub>2</sub>S efficacy in bladders contracted with KCl, compared to carbachol and KAc, suggests that the 80 mmol l<sup>-1</sup> Cl<sup>-</sup> may interfere with H<sub>2</sub>S. It is possible that HS<sup>-</sup>, which at physiological pH accounts for approximately 80% of the total H<sub>2</sub>S + HS<sup>-</sup> (Dombkowski et al., 2004) interferes with a Cl<sup>-</sup> channel or transporter and that this interference is diminished when transmembrane Cl<sup>-</sup> gradients are changed. However, we could not find any evidence for a Cl<sup>-</sup>-dependent mechanism using a variety of inhibitors of Cl<sup>-</sup> exchangers and channels (Fig. 4). Glibenclamide, which in addition to inhibiting K<sub>ATP</sub> channels inhibits the cAMP-activated cystic fibrosis transmembrane conductance regulator (CFTR) Cl<sup>-</sup> channel at micromolar concentrations (Sheppard et al., 1992) was ineffective. A Cl<sup>-</sup>/HCO<sub>3</sub><sup>-</sup> exchange is also doubtful as the Cl<sup>-</sup>/HCO<sub>3</sub><sup>-</sup> exchange inhibitor, DIDS, was ineffective (Fig. 4) and H<sub>2</sub>S relaxation was unaffected by the absence (Hepes buffer) or presence (Cortland buffer) of extracellular HCO<sub>3</sub><sup>-</sup>.

Although it is possible that 400 μmol l<sup>-1</sup> DIDS does not block Cl<sup>-</sup>/HCO<sub>3</sub><sup>-</sup> exchange in trout bladder, or the nominal absence of extracellular HCO<sub>3</sub><sup>-</sup> does not limit the cell's ability to utilize a Cl<sup>-</sup>/HCO<sub>3</sub><sup>-</sup> exchange, this seems unlikely. This question is further compounded by the lack of specificity of inhibitors of Cl<sup>-</sup>-dependent mechanisms (Jentsch et al., 2001). Clearly, additional studies with other inhibitors of Cl<sup>-</sup>-dependent mechanisms and variations in extracellular [Cl<sup>-</sup>] are warranted.

Patacchini et al. (Patacchini et al., 2004; Patacchini et al., 2005) reported that rat urinary bladders are indirectly contracted through H<sub>2</sub>S stimulation of capsaicin-sensitive nerves. We do not know whether or not the trout bladder has capsaicin-sensitive nerves. However, our results show that trout bladders are relaxed by H<sub>2</sub>S and this is not affected by blocking intrinsic neurons with tetrodotoxin, glycine/NMDA receptors with strychnine, or the presence of the capsaicin synthetic, *N*-vanillylnonanamide. Thus both the response and the mechanism of H<sub>2</sub>S action in trout urinary bladder are independent of intrinsic nerves, and are therefore unlike those observed in the mammalian urinary bladder.

H<sub>2</sub>S synthesis in mammalian vascular smooth muscle has been attributed to the pyridoxal-5'-dependent enzyme, cystathionine γ-lyase, whereas cystathionine β-synthase does not appear to be present (Zhao et al., 2001). Both enzymes are involved in H<sub>2</sub>S synthesis in non-vascular tissue (Zhao et al., 2003). Our studies also suggest that both enzymes contribute to H<sub>2</sub>S synthesis in the trout urinary bladder (Fig. 5). The increase in baseline tension and frequency of spontaneous contractions following inhibition of cystathionine γ-lyase with D,L-propargylglycine (Fig. 1C) also suggest that H<sub>2</sub>S is continuously synthesized by the bladder and has tonic inhibitory activity.

#### H<sub>2</sub>S as an oxygen sensor

We (Olson et al., 2006) recently proposed that H<sub>2</sub>S is an oxygen sensor in vascular smooth muscle. This hypothesis is based on our observations that, (1) H<sub>2</sub>S and hypoxia produce the same mechanical response in vessels from at least one species in every vertebrate class, even though the response varies from a contraction, to relaxation, to a multi-phasic one; (2) the effects of H<sub>2</sub>S and hypoxia are competitive – in the presence of one, the response to the other is greatly reduced or abolished; (3) blood vessels enzymatically generate H<sub>2</sub>S and inhibitors of H<sub>2</sub>S synthesis inhibit hypoxic responses, whereas the H<sub>2</sub>S precursor cysteine augments it. The present study suggests that H<sub>2</sub>S is also involved in oxygen sensing/signal transduction in the trout urinary bladder.

In essentially all of the present experiments the effects of hypoxia are similar, if not identical, to those produced by H<sub>2</sub>S. Hypoxia relaxes otherwise un-stimulated and pre-contracted bladders (Fig. 1), it becomes less efficacious in KCl-pre-contracted bladders (Fig. 2) and it is unaffected by inhibition of neuronal mechanisms with strychnine, tetrodotoxin or *N*-vanillylnonanamide. In pre-contracted bladders, the presence of either H<sub>2</sub>S or hypoxia prevents relaxation by the other. This does not appear to be due to a mechanical inability of the bladders to relax beyond a certain point because, with the

exception of a H<sub>2</sub>S relaxation of a carbachol contraction, neither H<sub>2</sub>S nor hypoxia produced 100% relaxation when applied initially (Fig. 2). Furthermore, hypoxic relaxation is reduced by inhibitors of bladder H<sub>2</sub>S synthesis (Fig. 6).

Inhibitors of cystathionine β-synthase (amino-oxyacetic acid) and cystathionine γ-lyase (D,L-propargylglycine) appeared more efficacious in inhibiting H<sub>2</sub>S synthesis (Fig. 5) than they were in inhibiting hypoxic relaxation (Fig. 6). This may be due to inhibitor accessibility to the enzyme; H<sub>2</sub>S production was measured in homogenized tissues whereas the hypoxia effects were examined in intact bladder rings. Other studies have also suggested that amino-oxyacetic acid is not readily taken up by smooth muscle cells (Zhao et al., 2003). It is also possible that there are other pathways for H<sub>2</sub>S synthesis (Julian et al., 2002; Maclean and Kraus, 2004; Stipanuk, 2004) or that H<sub>2</sub>S effects are compartmentalized within the cell (Dombkowski et al., 2005).

#### *Phylogeny of H<sub>2</sub>S and hypoxic responses*

The similarity of H<sub>2</sub>S and hypoxic responses in vertebrate vascular smooth muscle (Olson et al., 2006) may be a property of non-vascular smooth muscle as well. This suggests that H<sub>2</sub>S signaling in smooth muscle is a phylogenetically ancient mechanism. Clearly, additional tissues need to be examined. The primordial role of H<sub>2</sub>S in smooth muscle, or as a signal molecule in general is unknown, but certainly it could be coupled to O<sub>2</sub> availability. The effect of hypoxia (and H<sub>2</sub>S) in blood vessels is often commensurate with function: systemic vessels dilate to increase blood flow and match perfusion to metabolism, and respiratory vessels constrict to couple ventilation to perfusion. H<sub>2</sub>S seems ideally positioned to mediate these hypoxic responses as the constitutive vascular synthesis of H<sub>2</sub>S would be offset by H<sub>2</sub>S oxidation during normoxia, but progressively unabated as oxygen levels fall. The benefit of hypoxic relaxation of non-vascular smooth muscle is less obvious. Perhaps it is a mechanism to reduce oxygen demand in less critical tissues.

The authors wish to thank D. Meunick, R. Bell and the staff at the Richard Clay Bodine State Fish Hatchery, Indiana Department of Natural Resources for their help in obtaining steelhead tissues. This work was supported in part by NSF grant no. IBN 0235223.

#### References

- Abe, K. and Kimura, H. (1996). The possible role of hydrogen sulfide as an endogenous neuromodulator. *J. Neurosci.* **16**, 1066-1071.
- Cheng, Y., Ndisang, J. F., Tang, G., Cao, K. and Wang, R. (2004). Hydrogen sulfide-induced relaxation of resistance mesenteric artery beds of rats. *Am. J. Physiol.* **287**, H2316-H2323.
- Doeller, J. E., Isbell, T. S., Benavides, G., Koenitzer, J., Patel, H., Patel, R. P., Lancaster, J. R., Darley-Usmar, V. M. and Kraus, D. W. (2005). Polarographic measurement of hydrogen sulfide production and consumption by mammalian tissues. *Anal. Biochem.* **341**, 40-51.
- Dombkowski, R. A., Russell, M. J. and Olson, K. R. (2004). Hydrogen sulfide as an endogenous regulator of vascular smooth muscle tone in trout. *Am. J. Physiol.* **286**, R678-R685.
- Dombkowski, R. A., Russell, M. J., Schulman, A. A., Doellman, M. M. and Olson, K. R. (2005). Vertebrate phylogeny of hydrogen sulfide vasoactivity. *Am. J. Physiol.* **288**, R243-R252.
- Geng, B., Yang, J., Qi, Y., Zhao, J., Pang, Y., Du, J. and Tang, C. (2004). H<sub>2</sub>S generated by heart in rat and its effects on cardiac function. *Biochem. Biophys. Res. Commun.* **313**, 362-368.
- Hayden, L. J., Franklin, K. J., Roth, S. H. and Moore, G. J. (1989). Inhibition of oxytocin-induced but not angiotensin-induced rat uterine contractions following exposure to sodium sulfide. *Life Sci.* **45**, 2557-2560.
- Hosoki, R., Matsuki, N. and Kimura, H. (1997). The possible role of hydrogen sulfide as an endogenous smooth muscle relaxant in synergy with nitric oxide. *Biochem. Biophys. Res. Commun.* **237**, 527-531.
- Jentsch, T. J., Stein, V., Weinreich, F. and Zdebik, A. A. (2002). Molecular structure and physiological function of chloride channels. *Physiol. Rev.* **82**, 503-568.
- Julian, D., Statile, J. L., Wohlgenuth, S. E. and Arp, A. J. (2002). Enzymatic hydrogen sulfide production in marine invertebrate tissues. *Comp. Biochem. Physiol.* **133A**, 105-115.
- Kardong, K. V. (2005). The urogenital system. In *Vertebrates: Comparative Anatomy, Function, Evolution*, Chapter 14, pp. 577-578. New York: McGraw-Hill.
- Kimura, H. (2000). Hydrogen sulfide induces cyclic AMP and modulates the NMDA receptor. *Biochem. Biophys. Res. Commun.* **267**, 129-133.
- Kimura, H. (2002). Hydrogen sulfide as a neuromodulator. *Mol. Neurobiol.* **26**, 13-19.
- Leven, R. M., Leggett, R. E., Whitbeck, C. and Horan, P. (1999). Effect of diltiazem and pinacidil on the response of the rabbit urinary bladder to repetitive stimulation and in vitro ischemia. *NeuroUrol. Urodyn.* **18**, 129-137.
- Maclean, K. N. and Kraus, J. P. (2004). Hydrogen sulfide production and metabolism in mammalian tissues. In *Signal Transduction and the Gasotransmitters* (ed. R. Wang), pp. 275-292. Totowa, NJ: Humana Press.
- Olson, K. R. (2005). Vascular actions of hydrogen sulfide in non-mammalian vertebrates. *Antioxid. Redox Signal.* **7**, 804-812.
- Olson, K. R., Dombkowski, R. A., Russell, M. J., Doellman, M. M., Head, S. K., Whitfield, N. L. and Madden, J. A. (2006). Hydrogen sulfide as an oxygen sensor/transducer in vertebrate hypoxic vasoconstriction and hypoxic vasodilation. *J. Exp. Biol.*, in press.
- Patacchini, R., Santicoli, P., Giuliani, S. and Maggi, C. A. (2004). Hydrogen sulfide (H<sub>2</sub>S) stimulates capsaicin-sensitive primary afferent neurons in the rat urinary bladder. *Br. J. Pharmacol.* **142**, 31-34.
- Patacchini, R., Santicoli, P., Giuliani, S. and Maggi, C. A. (2005). Pharmacological investigation of hydrogen sulfide (H<sub>2</sub>S) contractile activity in rat detrusor muscle. *Eur. J. Pharmacol.* **509**, 171-177.
- Sheppard, D. N. and Welsh, M. J. (1992). Effect of ATP-sensitive K<sup>+</sup> channel regulators on cystic fibrosis transmembrane conductance regulator chloride currents. *J. Gen. Physiol.* **100**, 573-591.
- Shi, L., Du, J., Qi, J., Wei, B., Tang, C. and Tang, X. (2003). Effects of high pulmonary blood flow on pulmonary vasculature structure and the gene expression of cystathionine-gamma-lyase. *Beijing Da Xue Xue Bao* **35**, 566-570.
- Sidhu, R., Sing, M., Samir, G. and Carson, R. J. (2001). L-cysteine and sodium hydrosulphite inhibit spontaneous contractility of isolated pregnant rat uterine strips in vitro. *Pharmacol. Toxicol.* **88**, 198-203.
- Stipanuk, M. H. (2004). Sulfur amino acid metabolism: pathways for production and removal of homocysteine and cysteine. *Annu. Rev. Nutr.* **24**, 539-577.
- Teague, B., Asiedu, S. and Moore, P. K. (2002). The smooth muscle relaxant effect of hydrogen sulphide in vitro: evidence for a physiological role to control intestinal contractility. *Br. J. Pharmacol.* **137**, 139-145.
- Waring, J. V. and Wendt, I. R. (2000). Effects of anoxia on force, intracellular calcium and lactate production of urinary bladder smooth muscle from control and diabetic rats. *J. Urol.* **163**, 1357-1363.
- Whitbeck, C., Barreto, M., Horan, P., Levin, S. S. and Levin, R. M. (1999). Rabbit versus rat urinary bladder: effects of in vitro hypoxia. *Pharmacology* **59**, 156-164.
- Zhang, C., Du, J., Bu, D., Yan, H., Tang, X. and Tang, C. (2003). The regulatory effect of hydrogen sulfide on hypoxic pulmonary hypertension in rats. *Biochem. Biophys. Res. Commun.* **302**, 810-816.
- Zhao, W. and Wang, R. (2002). H<sub>2</sub>S-induced vasorelaxation and underlying cellular and molecular mechanisms. *Am. J. Physiol.* **283**, H474-H480.
- Zhao, W., Zhang, J., Lu, Y. and Wang, R. (2001). The vasorelaxant effect of H<sub>2</sub>S as a novel endogenous K<sub>ATP</sub> channel opener. *EMBO J.* **20**, 6008-6016.
- Zhao, W., Ndisang, J. F. and Wang, R. (2003). Modulation of endogenous production of H<sub>2</sub>S in rat tissues. *Can. J. Physiol. Pharmacol.* **81**, 848-853.
